# Supplementary material
Source: PubMed Central journal article supplement (PMC1891257)
Supplement: pnas_0701893104_1.pdf [file pnas_0701893104_1.pdf]

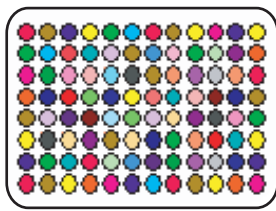

Pool 60 insertional mutants with unique DNA "tag"

Grown in fibroblast  
(non-restrictive)

Grown in mice  
(restrictive)

Isolate DNA  
Radiolabel "tag"

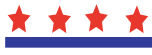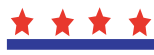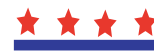

Probe identical  
membranes

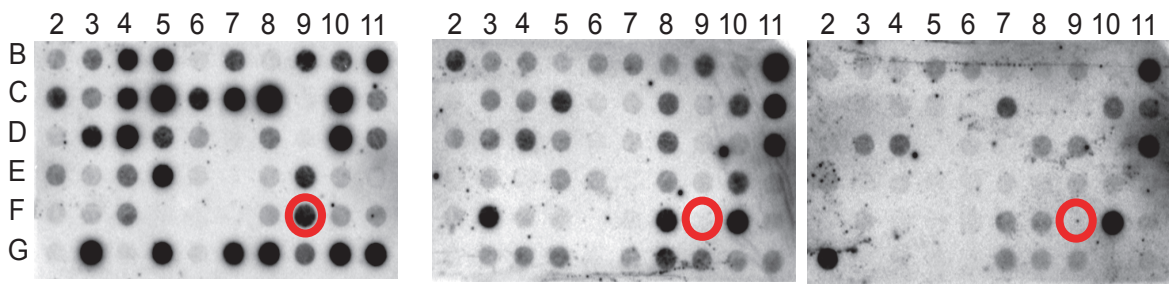

Cell culture

Mouse 1

Mouse 2

Clonal mouse infection

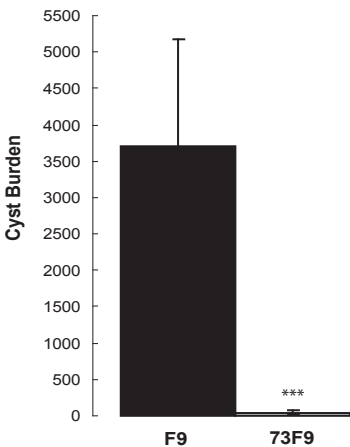

Chronic infection

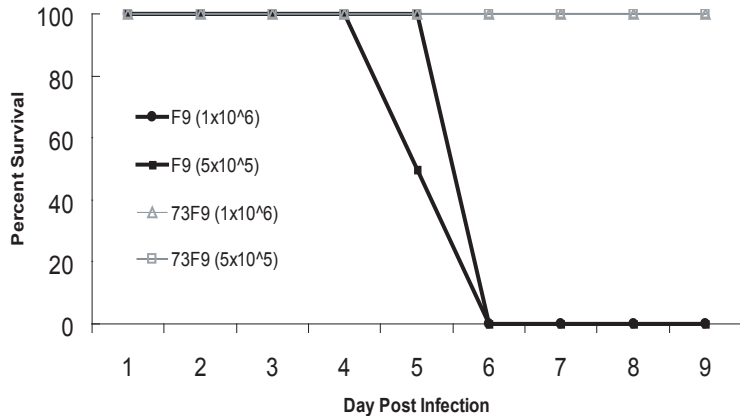

Acute infection
