# Supplementary material
Source: PubMed Central journal article supplement (PMC1891257)
Supplement: pnas_0701893104_3.pdf [file pnas_0701893104_3.pdf]

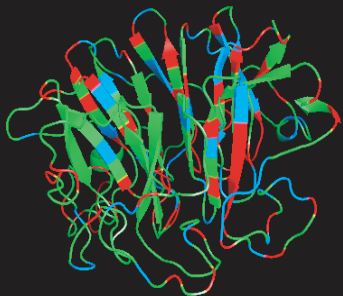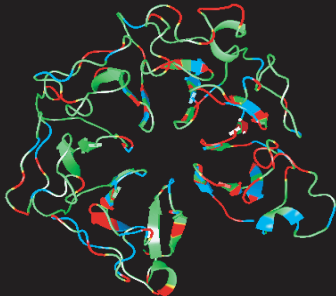

|        |                                                       |                                                       |                                                       |                                                        |                                               |     |
|--------|-------------------------------------------------------|-------------------------------------------------------|-------------------------------------------------------|--------------------------------------------------------|-----------------------------------------------|-----|
| TgRCC1 | <b>KD</b> VTRAT <b>SCA</b>                            | <b>MH</b> SAV <b>T</b> .TAD <b>G</b>                  | <b>RC</b> W <b>T</b> FC <b>Q</b> GD <b>G</b>          | <b>GAT</b> .GR <b>Q</b> DD <b>IG</b>                   | <b>DA</b> AT.SP <b>A</b> T <b>VS</b>          | 50  |
| HsRCC1 | <b>ED</b> V <b>VQ</b> AE <b>AGG</b>                   | <b>MH</b> T <b>V</b> CL <b>SK</b> SG                  | <b>QV</b> YS <b>F</b> GC <b>NDE</b>                   | <b>GAL</b> GRD <b>T</b> SV <b>E</b>                    | <b>GSE</b> M <b>V</b> PG <b>KVE</b>           | 50  |
| →      |                                                       |                                                       |                                                       |                                                        |                                               |     |
| TgRCC1 | <b>TDD</b> - <b>VT</b> AV <b>AC</b>                   | <b>GDS</b> HT <b>A</b> F <b>T</b> .TR                 | <b>EG</b> E <b>I</b> .V <b>I</b> AG <b>TY</b>         | <b>RDA</b> Y <b>CA</b> I <b>G</b> F <b>P</b>           | <b>DF</b> DAG <b>AG</b> V <b>AP</b>           | 99  |
| HsRCC1 | <b>LQ</b> E <b>K</b> V <b>VQ</b> V <b>SA</b>          | <b>GDS</b> HT <b>A</b> A <b>LTD</b>                   | <b>DGR</b> V <b>EL</b> W <b>GSF</b>                   | <b>RDN</b> NG <b>V</b> I <b>G</b> LL                   | <b>EPM</b> K <b>KS</b> M <b>V</b> P <b>V</b>  | 100 |
| →      |                                                       |                                                       |                                                       |                                                        |                                               |     |
| TgRCC1 | <b>TF</b> IS <b>H</b> R <b>A</b> T <b>PA</b>          | <b>T</b> V <b>F</b> S <b>G</b> LN <b>RPS</b>          | <b>T</b> S <b>Q</b> V <b>AC</b> GEN <b>H</b>          | <b>TA</b> AL <b>F</b> V <b>GG</b> AS                   | <b>FY</b> W <b>GS</b> <b>S</b> NE <b>FG</b>   | 149 |
| HsRCC1 | <b>QV</b> Q <b>LD</b> V <b>P</b> V <b>VK</b>          | <b>V</b> AS <b>EN</b> D <b>H</b> L <b>V</b> M         | <b>LT</b> AD <b>G</b> D <b>LY</b> TL                  | <b>GC</b> GE <b>Q</b> Q <b>GL</b> ER                   | <b>VP</b> EL <b>F</b> AN <b>RG</b> C          | 150 |
| →      |                                                       |                                                       |                                                       |                                                        |                                               |     |
| TgRCC1 | <b>QL</b> <b>G</b> V <b>S</b> SS <b>S</b> ST          | <b>AS</b> AA <b>Q</b> AR <b>DEA</b>                   | <b>LV</b> S <b>P</b> Q <b>GC</b> EA                   | <b>T</b> AD <b>KL</b> G <b>F</b> L <b>P</b>            | <b>QR</b> RT <b>V</b> G <b>EL</b> AP          | 199 |
| HsRCC1 | <b>RO</b> GL <b>ER</b> LL <b>V</b> P                  | <b>KC</b> V <b>ML</b> K <b>H</b> V <b>RF</b>          | <b>QD</b> A <b>FC</b> G <b>AY</b> FT                  | <b>F</b> A <b>I</b> S <b>H</b> E <b>G</b> H <b>V</b> Y | <b>GF</b> GL <b>S</b> NY <b>H</b> Q <b>L</b>  | 200 |
| →      |                                                       |                                                       |                                                       |                                                        |                                               |     |
| TgRCC1 | <b>S</b> V <b>R</b> N <b>L</b> S <b>I</b> RR <b>T</b> | <b>F</b> C <b>G</b> R <b>C</b> T <b>T</b> FL <b>S</b> | <b>L</b> S <b>S</b> S <b>F</b> AS <b>P</b> AL         | <b>S</b> S <b>S</b> AT <b>A</b> RE <b>CF</b>           | <b>RD</b> AS <b>NG</b> E <b>A</b> T <b>O</b>  | 249 |
| HsRCC1 | <b>G</b> T <b>P</b> G <b>T</b> ES <b>CF</b> L         | <b>P</b> Q <b>N</b> L <b>T</b> S <b>FK</b> NS         | <b>TK</b> S <b>W</b> V <b>CF</b> SS <b>G</b>          | <b>QH</b> HT <b>V</b> CM <b>D</b> SE                   | <b>G</b> K <b>A</b> Y <b>S</b> L <b>GR</b> AE | 250 |
| →      |                                                       |                                                       |                                                       |                                                        |                                               |     |
| TgRCC1 | <b>N</b> VE <b>Q</b> A <b>T</b> V <b>GC</b> G         | <b>R</b> N <b>R</b> Q <b>GE</b> V <b>GC</b> G         | <b>AA</b> AG <b>AV</b> VD <b>KF</b>                   | <b>EE</b> IR <b>S</b> LR <b>N</b> VD                   | <b>L</b> N <b>F</b> V <b>GG</b> Q <b>FF</b>   | 299 |
| HsRCC1 | <b>Y</b> GR <b>L</b> GL <b>GE</b> GA                  | <b>E</b> E <b>K</b> S <b>I</b> PT <b>L</b> IS         | <b>RL</b> PA <b>V</b> SS <b>V</b> AC                  | <b>G</b> AS <b>V</b> G <b>Y</b> AV <b>TK</b>           | <b>D</b> GR <b>V</b> FA <b>W</b> GM <b>G</b>  | 300 |
| →      |                                                       |                                                       |                                                       |                                                        |                                               |     |
| TgRCC1 | <b>S</b> VAL <b>R</b> T <b>D</b> GC <b>L</b>          | <b>Y</b> T <b>W</b> G <b>Q</b> S <b>D</b> FT <b>G</b> | <b>H</b> G <b>C</b> S <b>F</b> Y <b>G</b> V <b>V</b>  | <b>EE</b> PR <b>V</b> L <b>E</b> K <b>LA</b>           | <b>G</b> Q <b>V</b> HW                        | 344 |
| HsRCC1 | <b>T</b> NY <b>Q</b> L <b>G</b> T <b>G</b> Q <b>D</b> | <b>E</b> DA <b>W</b> SE <b>V</b> EM <b>M</b>          | <b>G</b> K <b>Q</b> L <b>E</b> NR <b>V</b> V <b>L</b> | <b>S</b> V <b>S</b> SG <b>G</b> Q <b>H</b> T <b>V</b>  | <b>L</b> L <b>V</b> K <b>D</b>                | 345 |
| →      |                                                       |                                                       |                                                       |                                                        |                                               |     |
