# Supplementary material
Source: PubMed Central journal article supplement (PMC1891257)

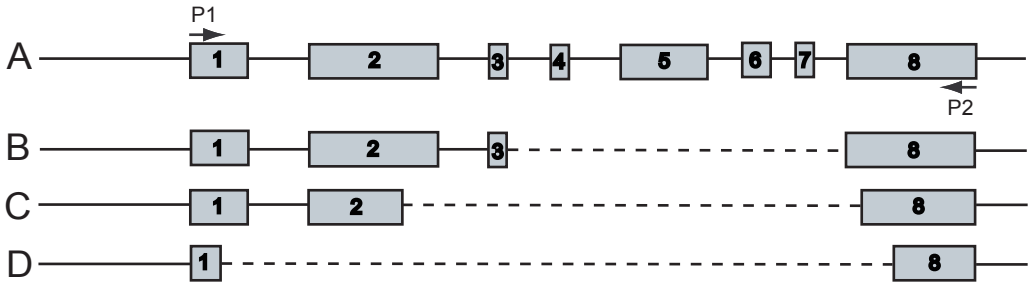

Supplement: pnas_0701893104_2.pdf [file pnas_0701893104_2.pdf]

Tubulin

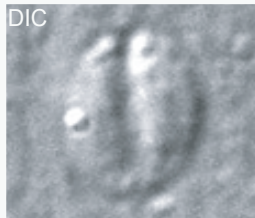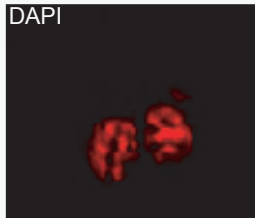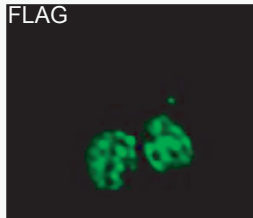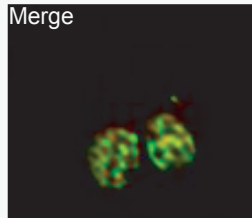

Native

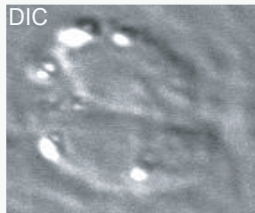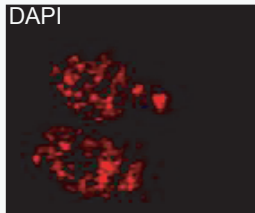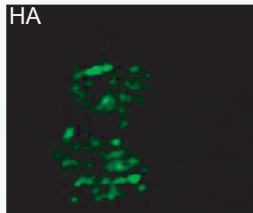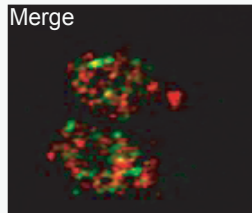

Supplement: pnas_0701893104_4.pdf [file pnas_0701893104_4.pdf]

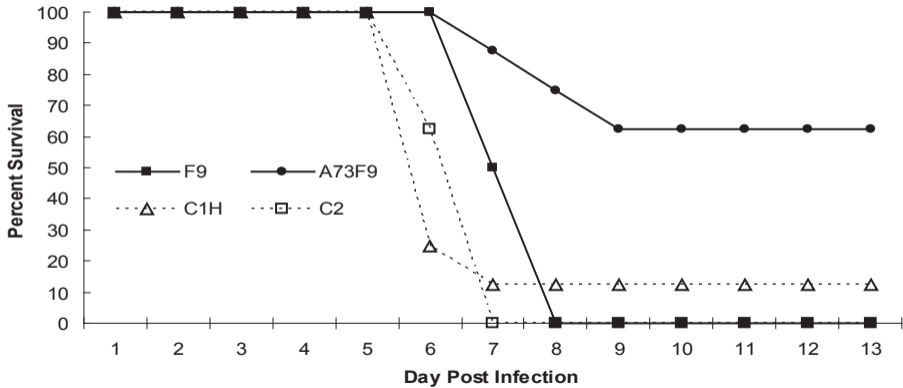

Supplement: pnas_0701893104_5.pdf [file pnas_0701893104_5.pdf]
